# Supplementary material for: Can Physical Activity While Sedentary Produce Health Benefits? A Single-Arm Randomized Trial
Source: PubMed Central journal article supplement (PMC7532252; doi:10.1186/s40798-020-00278-3), 2020-10-02

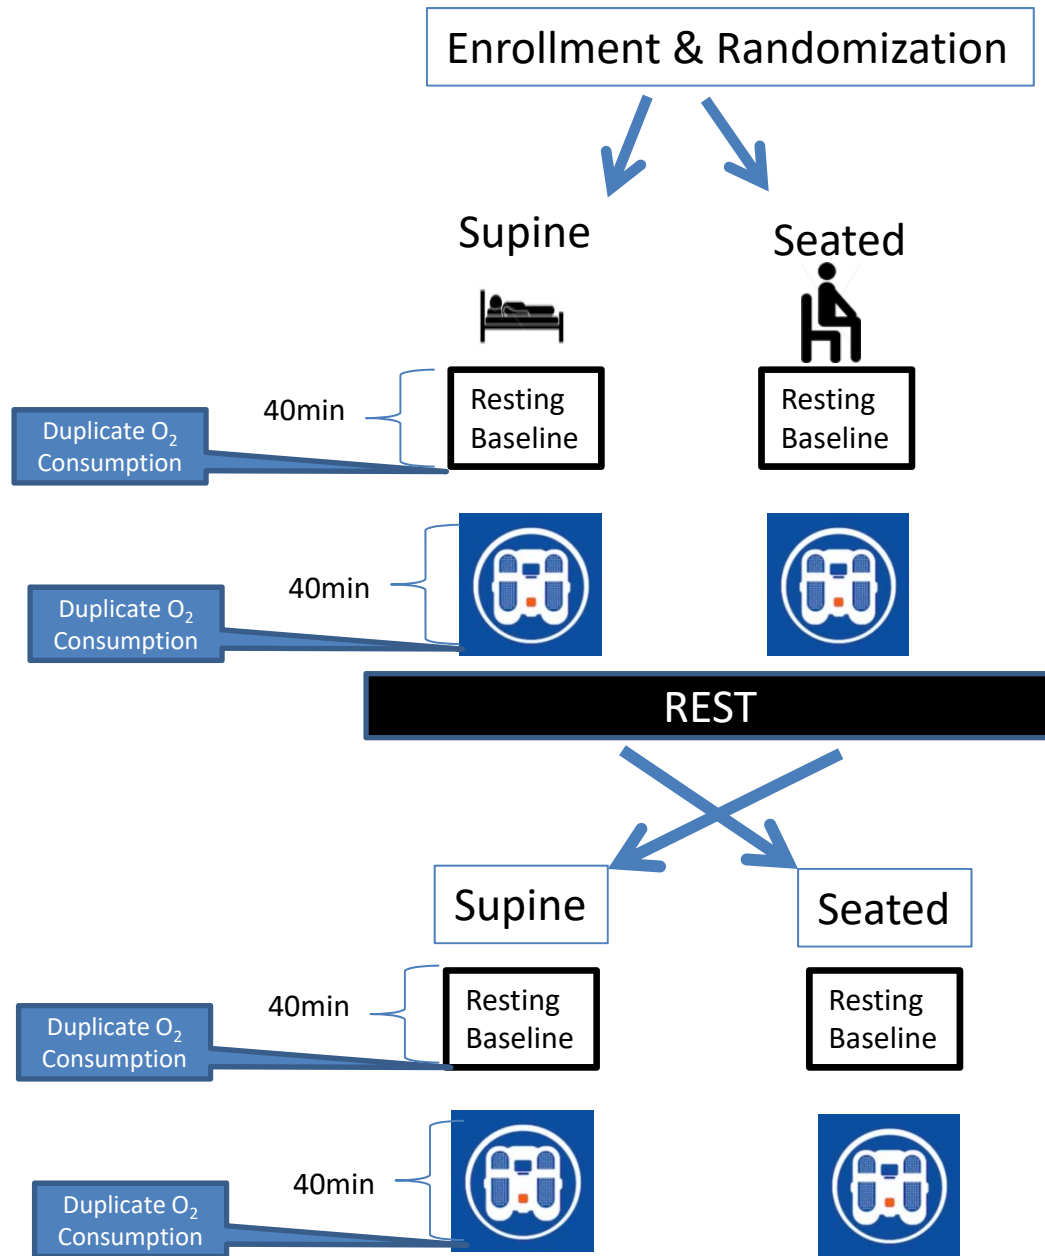

# CONSORT DIAGRAM

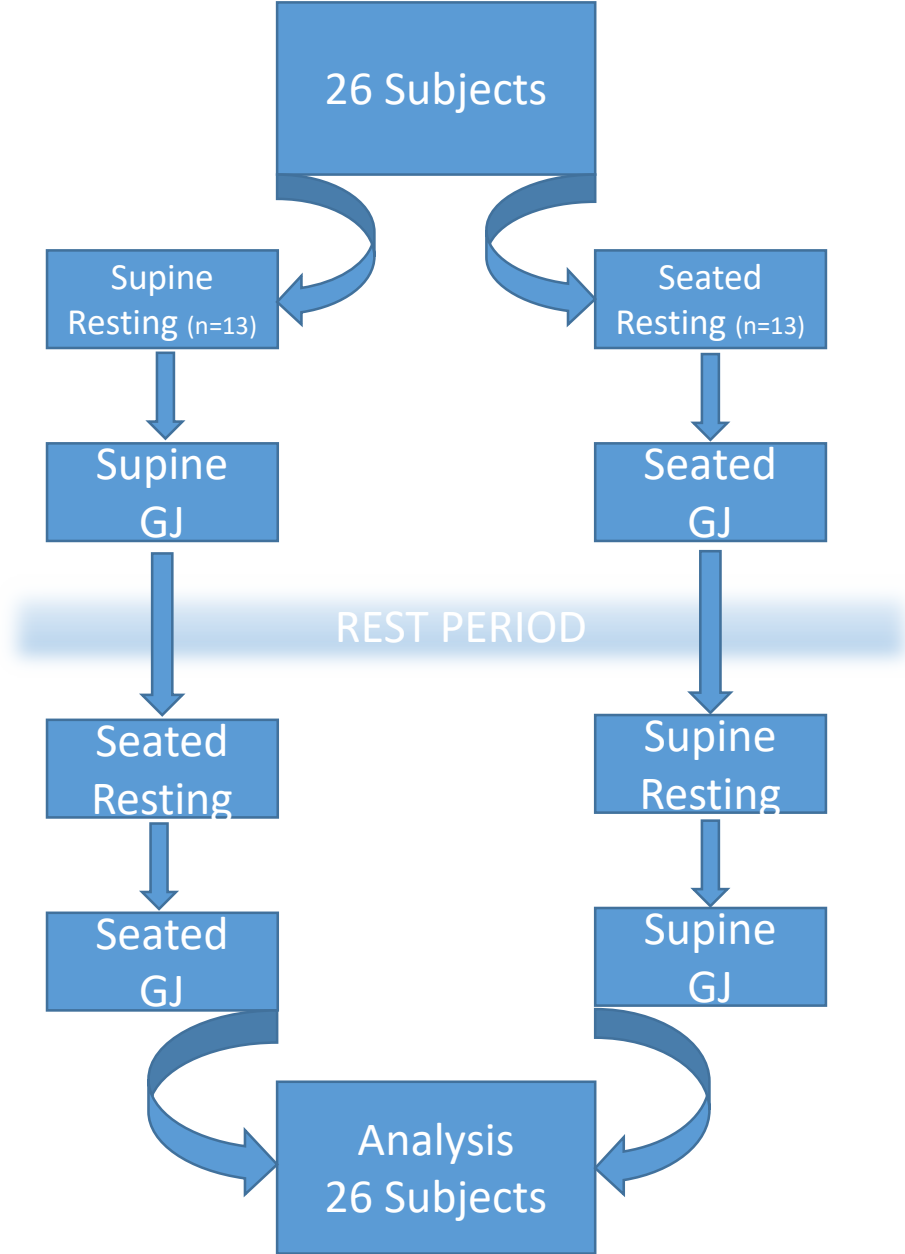

Supplement: 40798_2020_278_MOESM1_ESM.pdf [file 40798_2020_278_MOESM1_ESM.pdf]
